# Supplementary material for: PGIP: A web server for the rapid taxonomic identification of parasite genomes
Source: Research Square preprint supplement (doi:10.21203/rs.3.rs-6765437/v1), 2025-06-02
Supplement: Supplementary file [file 543caa3bad36794bd8f14802.pdf]

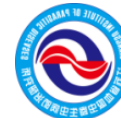

# Genome sequencing of predicted parasite sample

|              |                               |                                                   |
|--------------|-------------------------------|---------------------------------------------------|
| Name: -      | Sample ID: sample23111001     | Submitting Institution: Outpatient Department     |
| Gender: Male | Sample Type: Parasitic tissue | Clinical Diagnosis: Suspected sparganum infection |
| Age: 46      | Date: 2023-11-10              |                                                   |

**Testing item:** Parasite identification

**Detection Method:** Metagenomic Sequencing

## Results:

| Rank | Latin Name                         | Mapped reads | Relative Abundance (%) |
|------|------------------------------------|--------------|------------------------|
| 1    | <i>Spirometra erinaceieuropaei</i> | 28,584,220   | 93.37                  |
| 2    | <i>Schistocephalus solidus</i>     | 65,354       | 0.21                   |
| 3    | <i>Dibothriocephalus latus</i>     | 23,176       | 0.08                   |
| 4    | <i>Trichobilharzia regenti</i>     | 2,965        | 0.01                   |
| 5    | <i>Fasciola hepatica</i>           | 1,864        | 0.01                   |
| 6    | <i>Schistosoma japonicum</i>       | 1,614        | 0.01                   |
| 7    | <i>Schistosoma margrebowiei</i>    | 2,894        | 0.01                   |
| 8    | <i>Macrostomum lignano</i>         | 1,543        | 0.01                   |
| 9    | <i>Schmidtea mediterranea</i>      | 1,583        | 0.01                   |
| 10   | <i>Echinostoma caproni</i>         | 1,788        | 0.01                   |

## Quality Control Results:

| Total reads | Total bases | Q20    | Q30    | GC Content |
|-------------|-------------|--------|--------|------------|
| 61488424    | 9174435098  | 98.15% | 94.55% | 43.80%     |

**Note:** Q20/Q30 represent the error probability assigned during base calling in sequencing. Q20 indicates a 1% error rate (99% accuracy), while Q30 indicates a 0.1% error rate (99.9% accuracy). The minimum acceptable thresholds are typically  $\geq 90\%$  for Q20 and  $\geq 85\%$  for Q30.

**Conclusion:** Sparganum infection.

## Disclaimer

1. This assay is a non-routine clinical test intended for reference purposes only. Clinical interpretation must be conducted by licensed physicians. Any objections must be raised within seven work days.
2. Improper procedures in specimen collection, preservation, or transportation may compromise the analytical performance of this assay.
3. Results are valid solely for the submitted specimen. Methodological detection limits, subthreshold pathogen load, database limitations, or prior medication may result in undetected pathogens.
4. The testing provider shall rigorously protect patient privacy and test results in accordance with applicable laws.

Performed by:

Reviewed by:

Report Date: 2023-11-17

Address: 117 Yangxiang, Meiyuan, Wuxi City, Jiangsu Province, China

Postal Code: 214064

Email: src@jipd.com
